# Supplementary material for: Modulating defective oxygen of Co-based crystals by calcination temperature control for improving the catalytic removal of propane
Source: Royal Society of Chemistry journal article supplement (doi:10.1039/d2ce01257j), 2022-01-01
Supplement: d2ce01257j1.pdf [file d2ce01257j1.pdf]

## Supporting Information

### **Modulating Defective Oxygen of Co-based Crystals by Calcination**

#### **Temperature for Improving Catalytic Removal of Propane**

Mei Wang,<sup>a,b</sup> Lei Qi,<sup>a</sup> Xinheng Li <sup>\*,a,b</sup>

<sup>a</sup> The State Key Laboratory for Oxo Synthesis and Selective Oxidation, Suzhou Research Institute of LICP, Lanzhou Institute of Chemical Physics (LICP), Chinese Academy of Sciences, Lanzhou, 730000, China.

<sup>b</sup> University of Chinese Academy of Sciences, Beijing 100049, China.

Corresponding Author E-mail: [xinhengli@licp.cas.cn](mailto:xinhengli@licp.cas.cn)

## **Experimental**

### **Catalyst preparation**

#### (1) Preparation of $\text{Co}_3\text{O}_4$ crystals

The specific experimental procedure is as follows: 4.5 mmol  $\text{Co}(\text{NO}_3)_2 \cdot 6\text{H}_2\text{O}$  was dissolved in 50 mL of deionized water, and then 8 mmol of urea and 0.3 mmol of sodium citrate dihydrate were added under constant stirring, followed by stirring for 1 h. The resulting solution was transferred to a PTFE-lined stainless steel autoclave and heated at 180 °C for 1 h. The obtained pink pellet was centrifuged to pH = 7 and lyophilized for 12 h.

#### (2) Calcination of $\text{Co}_3\text{O}_4$

A series of  $\text{Co}_3\text{O}_4$  catalysts were prepared by calcining the  $\text{Co}_3\text{O}_4$  precursor in an air atmosphere, the heating rate was 2 °C·min<sup>-1</sup>, and the calcination time was 4 h.

### **Catalyst Characterization**

Scanning electron microscopy (SEM) images were taken on a Hitachi S4800 scanning electron microscopy. TEM images were obtained using a FEI F20 with an acceleration voltage of 200 kV. Thermogravimetry and derivative thermogravimetry (TG/DTG) was recorded using a Mettler-Toledo TGA/DSC. The sample was heated to 500 °C at a heating rate of 10 °C·min<sup>-1</sup>, and the feed gas (air) flow rate was 50 mL·min<sup>-1</sup>. Fourier Transform infrared spectroscopy (FTIR) spectroscopy was performed on a Thermo Fisher Scientific Nicolet 6700 spectrometer. X-ray diffraction (XRD) patterns were collected by a Rigaku SmartLab 3 Kw instrument with Cu K $\alpha$  radiation (40 kV, 30 mA). N<sub>2</sub> physisorption was performed on a Micromeritics ASAP 2020 instrument. X-ray photoelectron spectroscopy (XPS) was performed on a Thermo Fisher Scientific NEXSA instrument. Raman spectra in the range of 100~1500 cm<sup>-1</sup> were obtained on a confocal microprobe raman spectroscopy (LabRAM HR Evolution, HORIBA Jobin Yvon). O<sub>2</sub> temperature-programmed desorption (O<sub>2</sub>-TPD), CO<sub>2</sub> temperature-programmed desorption (CO<sub>2</sub>-TPD), and H<sub>2</sub> temperature-programmed reduction (H<sub>2</sub>-TPR) were measured using a Xiangen TP-5080 instrument. For TPD, each catalyst was first pretreated under He atmosphere at 180 °C for 30 min to remove moisture. Next, the system was purged with He for 2 h and cooled to room temperature before chemisorption.

After adsorbing O<sub>2</sub> or CO<sub>2</sub> at 50 °C for 30 min, it was heated to 700 °C at a rate of 10 °C·min<sup>-1</sup> under He flow. For H<sub>2</sub>-TPR, each sample was pretreated at 180 °C for 1 h under an Ar atmosphere, and then heated to 700 °C at a rate of 10 °C·min<sup>-1</sup> under a 10% H<sub>2</sub> / Ar flow rate.

### Catalyst activity test

The catalytic combustion reaction was carried out in a continuous flow microreactor consisting of a quartz tube with an inner diameter of 4 mm and a height of 400 mm. 0.1g of catalyst particles (40-60 mesh) were placed in the quartz tube reactor, and both ends of the catalyst were blocked with quartz wool. A reaction gas containing 1000 ppm propane (air as balance gas) was passed through the reactor at a flow rate of 50 mL·min<sup>-1</sup> and the WHSV of 30,000 mL·g<sub>cat</sub><sup>-1</sup>·h<sup>-1</sup>. Effluent gases were analyzed online using a gas chromatograph (SHIMADZU GC-2014C) equipped with a FID flame ionization detector. Catalytic activity was measured in the range of 50–250 °C. Propane conversion is calculated using Equation 1:

$$X_{C_3H_8} = \frac{[C_3H_8]_{in} - [C_3H_8]_{out}}{[C_3H_8]_{in}} \quad (1)$$

where [C<sub>3</sub>H<sub>8</sub>]<sub>in</sub> and [C<sub>3</sub>H<sub>8</sub>]<sub>out</sub> represent the import and export concentrations of propane, respectively.

The reaction rate (mmol mg<sup>-1</sup> h<sup>-1</sup>) is calculated according to Equation (2):

$$r_{C_3H_8} = \frac{10^3 \cdot 3600 \cdot X_{C_3H_8} \cdot V_{C_3H_8}}{W_{cat}} \quad (2)$$

where W<sub>cat</sub> represents the catalyst mass and V<sub>C<sub>3</sub>H<sub>8</sub></sub> represents the gas flow rate of C<sub>3</sub>H<sub>8</sub> (mol s<sup>-1</sup>).

The reaction activation energy (E<sub>a</sub>) was calculated by Equation (3):

$$\ln r_{C_3H_8} = -\frac{E_a}{RT} + \ln A \quad (3)$$

where r<sub>C<sub>3</sub>H<sub>8</sub></sub> represents the propane reaction rate, E<sub>a</sub> represents the reaction activation energy (kJ mol<sup>-1</sup>), R represents the gas constant (J mol<sup>-1</sup> K<sup>-1</sup>), and T represents the reaction temperature (K).

The stability testing of the catalyst was performed at 180°C.

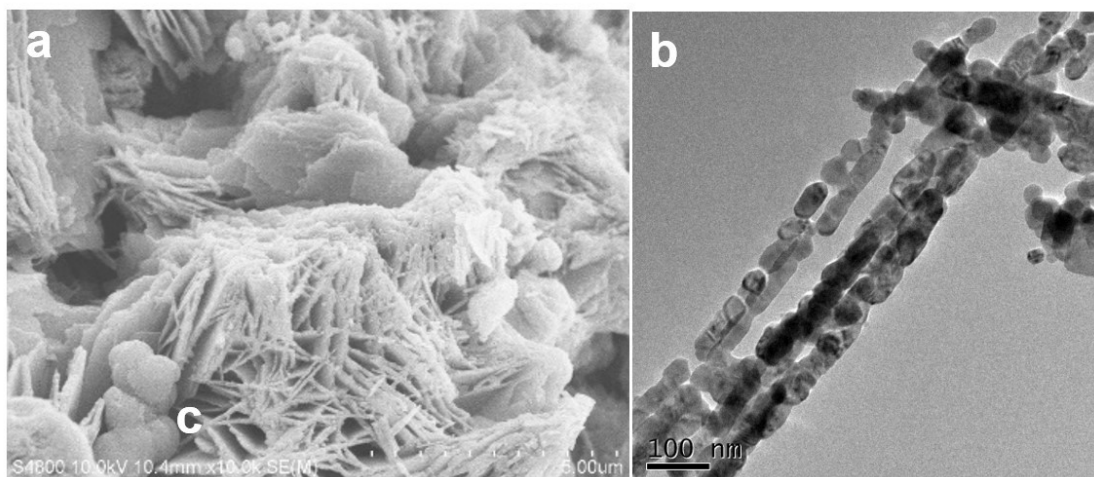

Fig. S1 The SEM and low-magnification TEM of Co-450. Scale bars are 5 $\mu$ m and 100 nm.

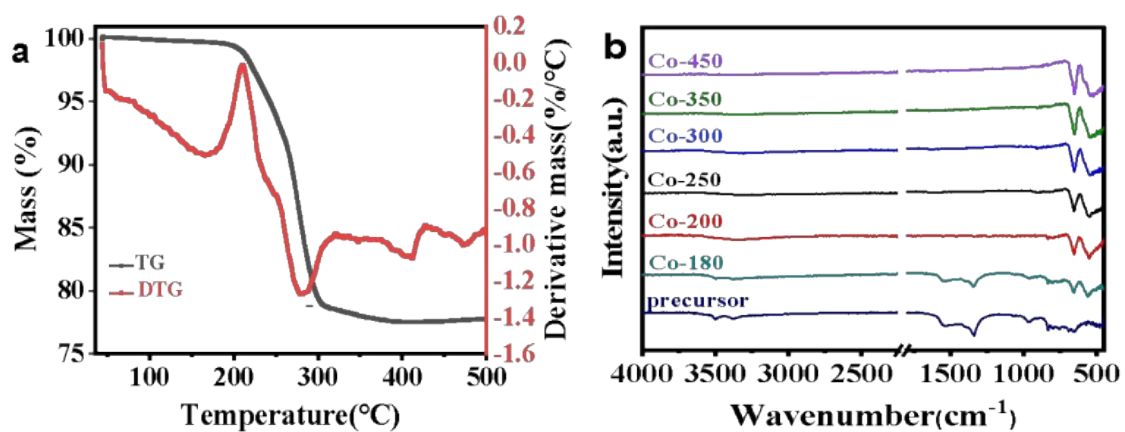

Fig. S2 (a) TG/DTG profile of the cobalt oxide precursors. (b) FTIR of the  $\text{Co}_3\text{O}_4$  precursors and the  $\text{Co}_3\text{O}_4$  catalysts calcinated at different temperatures.

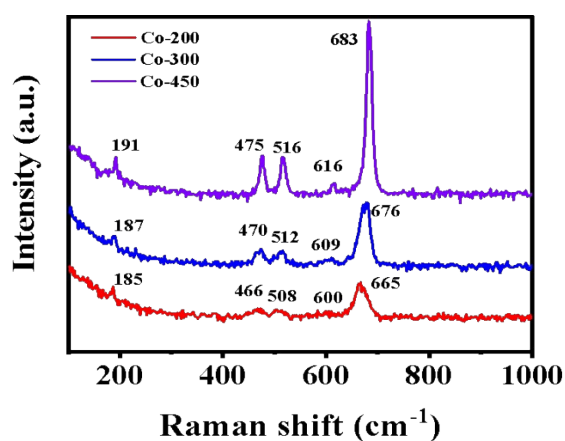

Fig. S3 Raman of the  $\text{Co}_3\text{O}_4$  catalysts calcinated at different temperatures.

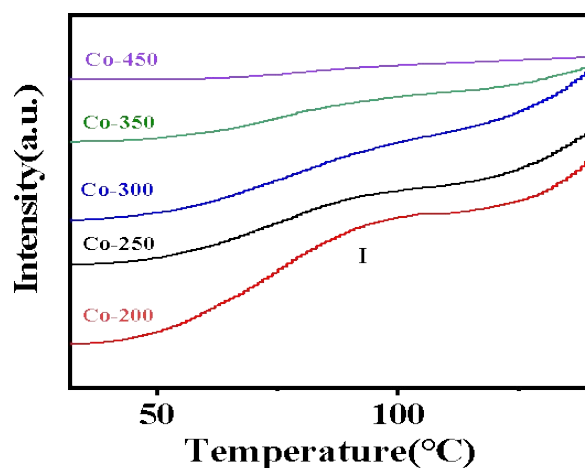

Fig. S4 Local magnification of  $H_2$ -TPR profiles of catalysts calcined at different temperatures.

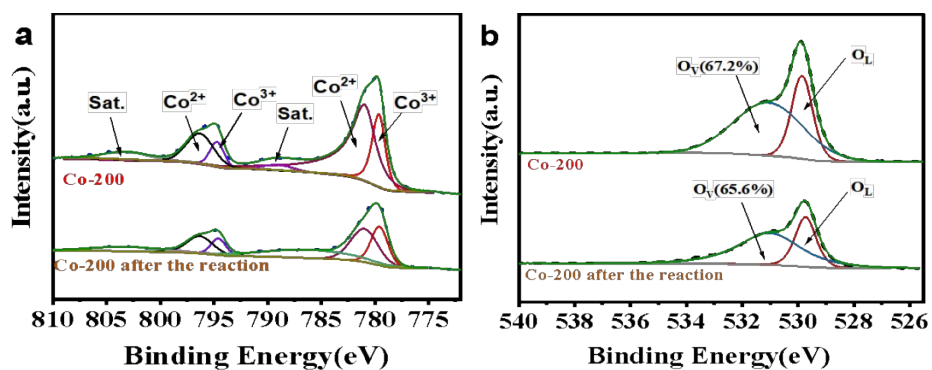

Fig. S5 (a) Co 2p and (b) O 1s XPS spectra of the Co-200 catalysts before and after the reaction.

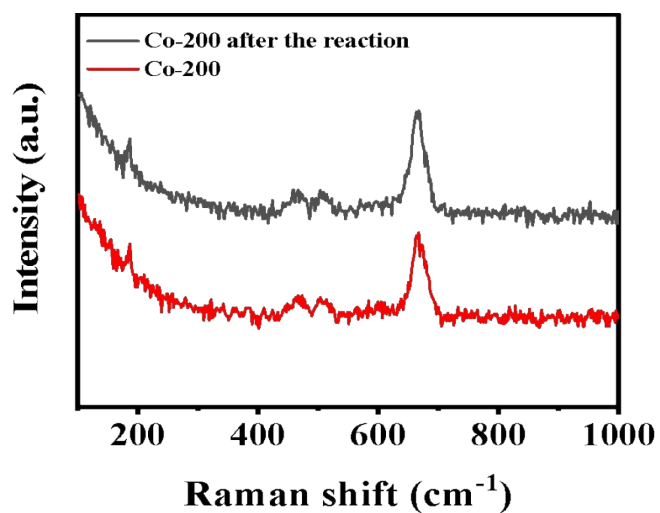

Fig. S6 Raman spectra of the Co-200 catalysts before and after the reaction.

Table S1 SSA and average pore diameter of the Co<sub>3</sub>O<sub>4</sub> catalysts.

| Samples | SSA (m <sup>2</sup> / g) | Average pore diameter (nm) |
|---------|--------------------------|----------------------------|
| Co-200  | 176.08                   | 2.2                        |
| Co-250  | 219.32                   | 2.3                        |
| Co-300  | 127.29                   | 3.7                        |
| Co-350  | 41.88                    | 8.8                        |
| Co-450  | 21.19                    | 46.7                       |

Table S2. Surface element analysis of the Co<sub>3</sub>O<sub>4</sub> catalysts calcined at different temperatures.

| Samples | Co <sup>3+</sup> /Co <sup>2+</sup> | O <sub>V</sub> (%) <sup>a</sup> |
|---------|------------------------------------|---------------------------------|
| Co-200  | 0.35                               | 67.2                            |
| Co-300  | 0.50                               | 54.0                            |
| Co-450  | 0.61                               | 52.6                            |

\*aO<sub>V</sub>(%)=O<sub>V</sub>/(O<sub>V</sub>+O<sub>L</sub>)

Table S3 Catalytic activity of the Co<sub>3</sub>O<sub>4</sub> catalysts for propane oxidation.

| Samples | T <sub>50</sub> (°C) | T <sub>90</sub> (°C) |
|---------|----------------------|----------------------|
| Co-200  | 147                  | 170                  |
| Co-250  | 161                  | 177                  |
| Co-300  | 167                  | 183                  |
| Co-350  | 179                  | 197                  |
| Co-450  | 194                  | 216                  |

Table S4 Comparison of some catalysts reported in the literature for propane oxidation.

| Sample                                         | Reaction conditions                                         | WHSV <sup>a</sup><br>(mL·g <sub>cat</sub> <sup>-1</sup> ·h <sup>-1</sup> ) | T <sub>50</sub> <sup>b</sup><br>(°C) | T <sub>90</sub> <sup>b</sup><br>(°C) | Ref.      |
|------------------------------------------------|-------------------------------------------------------------|----------------------------------------------------------------------------|--------------------------------------|--------------------------------------|-----------|
| Co-200                                         | 1000 ppm C <sub>3</sub> H <sub>8</sub> + Air                | 30,000                                                                     | 147                                  | 170                                  | This work |
| Co <sub>3</sub> O <sub>4</sub> -R              | 2500 ppm C <sub>3</sub> H <sub>8</sub> + Air                | 30,000                                                                     | 170                                  | 195                                  | [1]       |
| Co <sub>3</sub> O <sub>4</sub> -S              | 900 ppm C <sub>3</sub> H <sub>8</sub> + Air                 | 30,000                                                                     | 203                                  | 210                                  | [2]       |
| CoO-Co <sub>3</sub> O <sub>4</sub>             | 3000 ppm C <sub>3</sub> H <sub>8</sub> + Air                | 30,000                                                                     | 214                                  | 235                                  | [3]       |
| Co <sub>2</sub> Ce <sub>1</sub> O <sub>x</sub> | 800 ppm C <sub>3</sub> H <sub>8</sub> + 10% O <sub>2</sub>  | 90,000                                                                     | 215                                  | 249                                  | [4]       |
| Co <sub>3</sub> O <sub>4</sub>                 | 2500 ppm C <sub>3</sub> H <sub>8</sub> + 10% O <sub>2</sub> | 120,000                                                                    | 225                                  | 241                                  | [5]       |
| Co <sub>3</sub> O <sub>4</sub> /ZSM-5          | 2000 ppm C <sub>3</sub> H <sub>8</sub> + 2%O <sub>2</sub>   | 30,000                                                                     | 235                                  | 260                                  | [6]       |
| 1.5%Ru/CeO <sub>2</sub>                        | 2000 ppm C <sub>3</sub> H <sub>8</sub> + 2%O <sub>2</sub>   | 30,000                                                                     | 170                                  | 190                                  | [7]       |
| 0.5%Pt/BN                                      | 2000 ppm C <sub>3</sub> H <sub>8</sub> + 2%O <sub>2</sub>   | 80,000                                                                     | 260                                  | 340                                  | [8]       |
| 5%Ru-<br>Mo/Al <sub>2</sub> O <sub>3</sub>     | 800 ppm C <sub>3</sub> H <sub>8</sub> + Air                 | 60,000                                                                     | 150                                  | 200                                  | [9]       |
| 1%Pt/AlF <sub>3</sub>                          | 2000 ppm C <sub>3</sub> H <sub>8</sub> + 2%O <sub>2</sub>   | 80,000                                                                     | 230                                  | 290                                  | [10]      |

<sup>a</sup> Weight hourly space velocity; <sup>b</sup> Temperatures at which 50% and 90% conversion of propane.

## References

- [1] Y.F. Jian, M.J. Tian, C. He, J.C. Xiong, Z.Y. Jiang, H. Jin, L.R. Zheng, R. Albilali and J.W. Shi, *Appl. Catal. B-Environ.*, 2021, **283**, 119657.
- [2] K. Chen, W.Z. Li, Z.A. Zhou, Q.F. Huang, Y. Liu and Q.Y. Duan, *Catal. Sci. Technol.*, 2020, **10**, 2573-2582.
- [3] Z. Liu, L.J. Cheng, J. Zeng, X. Hu, S.Y. Zhangxue, S.L. Yuan, Q.F. Bo, B. Zhang and Y. Jiang, *Chem. Phys.*, 2021, **540**, 110984.
- [4] S. Zhang, S.J. Liu, X.C. Zhu, Y. Yang, W.S. Hu, H.T. Zhao, R.Y. Qu, C.H. Zheng and X. Gao, *Appl. Surf. Sci.*, 2019, **479**, 1132-1140.
- [5] W.X. Tang, J.F. Weng, X.X. Lu, L.Y. Wen, A. Suburamanian, C.Y. Nam and P.X. Gao, *Appl. Catal. B-Environ.*, 2019, **256**, 117859.
- [6] Z.Z. Zhu, G.Z. Lu, Z.G. Zhang, Y. Guo, Y.L. Guo and Y.Q. Wang, *Acs Catal.*, 2013, **3**, 1154-1164.
- [7] Z. Hu, Z. Wang, Y. Guo, L. Wang, Y.L. Guo, J.S. Zhang and W.C. Zhan, *Environ. Sci. Technol.*, 2018, **52**, 9531-9541.
- [8] Y.R. Liu, X. Li, W.M. Liao, A.P. Jia, Y.J. Wang, M.F. Luo and J.Q. Lu, *Acs Catal.*, 2019, **9**, 1472-1481.
- [9] K. Adamska, J. Okal and W. Tylus, *Appl. Catal. B-Environ.*, 2019, **246**, 180-194.
- [10] X. Li, Y.R. Liu, W.M. Liao, A.P. Jia, Y.J. Wang, J.Q. Lu and M.F. Luo, *Appl. Surf. Sci.*, 2019, **475**, 524-531.
